# Supplementary material for: Five-Year Suicidal Ideation Trajectories Among Women Receiving or Being Denied an Abortion
Source: Atypon-hosted journal article supplement (doi:10.1176/appi.ajp.2018.18010091), 2018-05-24
Supplement: appi.ajp.2018.18010091.ds001.pdf [file appi.ajp.2018.18010091.ds001.pdf]

 


Psychiatry Online
