# Supplementary material for: Five-Year Suicidal Ideation Trajectories Among Women Receiving or Being Denied an Abortion
Source: Atypon-hosted journal article supplement (doi:10.1176/appi.ajp.2018.18010091), 2018-05-24
Supplement: appi.ajp.2018.18010091.ds001.pdf [file appi.ajp.2018.18010091.ds001.pdf]

**TABLE S1. Associations Between Receipt and Denial of Abortion and Mean Suicidal Ideation Outcomes Over Time Using Adjusted Mixed-Effects Linear Regression**

| Independent Variables                                          | Mean Suicidal Ideation Symptoms <sup>a</sup> |              |                              |              |
|----------------------------------------------------------------|----------------------------------------------|--------------|------------------------------|--------------|
|                                                                | Brief Symptom Inventory                      |              | Patient Health Questionnaire |              |
|                                                                | Coefficient                                  | 95% CI       | Coefficient                  | 95% CI       |
| <b>Study group</b>                                             |                                              |              |                              |              |
| Near-limit group (reference)                                   |                                              |              |                              |              |
| Turnaway-birth group                                           | 0.00                                         | -0.02, 0.01  | -0.02*                       | -0.04, 0.00  |
| Turnaway-no-birth group                                        | 0.00                                         | -0.03, 0.03  | 0.01                         | -0.03, 0.04  |
| First-trimester group                                          | 0.01                                         | -0.01, 0.02  | -0.01                        | -0.03, 0.01  |
| <b>Years</b>                                                   |                                              |              |                              |              |
| Turnaway-birth by time                                         | -0.00*                                       | -0.01, -0.00 | -0.00*                       | -0.01, -0.00 |
| Turnaway-no-birth by time                                      | -0.00                                        | -0.01, 0.01  | 0.01*                        | 0.00, 0.02   |
| First-trimester by time                                        | -0.00                                        | -0.01, 0.00  | -0.00                        | -0.01, 0.01  |
| <b>Covariates</b>                                              |                                              |              |                              |              |
| <b>Race/ethnicity (reference: white)</b>                       |                                              |              |                              |              |
| Black                                                          | 0.00                                         | -0.01, 0.01  | 0.00                         | -0.01, 0.01  |
| Hispanic pr Latina                                             | 0.01*                                        | 0.00, 0.03   | 0.00                         | -0.01, 0.01  |
| Other                                                          | 0.00                                         | -0.01, 0.02  | 0.00                         | -0.02, 0.01  |
| <b>Age</b>                                                     |                                              |              |                              |              |
| Age                                                            | -0.00                                        | -0.00, 0.00  | 0.00                         | -0.00, 0.00  |
| <b>Marital status (reference: single)</b>                      |                                              |              |                              |              |
| Married                                                        | -0.00                                        | -0.02, 0.01  | 0.00                         | -0.02, 0.01  |
| Divorced or widowed                                            | 0.01                                         | -0.00, 0.02  | 0.01                         | -0.01, 0.02  |
| <b>Employed</b>                                                |                                              |              |                              |              |
| Employed                                                       | -0.00                                        | -0.01, 0.01  | 0.00                         | -0.01, 0.01  |
| <b>Parity (reference: nulliparous)</b>                         |                                              |              |                              |              |
| Baby under age 1                                               | 0.01                                         | -0.01, 0.02  | 0.01                         | -0.01, 0.02  |
| 1 previous birth, no past-year birth                           | -0.00                                        | -0.01, 0.01  | 0.01*                        | 0.00, 0.03   |
| ≥2 previous births, no past-year birth                         | -0.00                                        | -0.02, 0.01  | 0.00                         | -0.01, 0.02  |
| <b>Child abuse or neglect</b>                                  |                                              |              |                              |              |
| Child abuse or neglect                                         | 0.01                                         | 0.00, 0.03   | 0.01                         | 0.00, 0.03   |
| <b>Intimate partner violence and sexual assault</b>            |                                              |              |                              |              |
| Intimate partner violence and sexual assault                   | 0.01                                         | -0.01, 0.02  | 0.00                         | -0.01, 0.02  |
| <b>History of depression or anxiety</b>                        |                                              |              |                              |              |
| History of depression or anxiety                               | 0.02*                                        | 0.01, 0.03   | 0.02*                        | 0.01, 0.03   |
| <b>Any prior drug use</b>                                      |                                              |              |                              |              |
| Any prior drug use                                             | 0.00                                         | -0.01, 0.02  | 0.01                         | -0.00, 0.03  |
| <b>Prior problem alcohol use</b>                               |                                              |              |                              |              |
| Prior problem alcohol use                                      | 0.02                                         | -0.00, 0.04  | 0.02*                        | 0.00, 0.04   |
| <b>Highest level of education (reference: &lt;high school)</b> |                                              |              |                              |              |
| High school or equivalent                                      | -0.01                                        | -0.02, 0.00  | -0.01                        | -0.02, 0.01  |
| Some college, associate's degree, or technical school          | -0.01                                        | -0.02, 0.01  | -0.01*                       | -0.03, -0.00 |
| College degree or higher                                       | 0.00                                         | -0.02, 0.01  | -0.02                        | -0.04, 0.00  |

<sup>a</sup> The Brief Symptom Inventory was administered 1 week after abortion seeking and again every 6 months through 5 years, and the Patient Health Questionnaire was administered at 6 months and again every 6 months through 5 years. \*p<0.05.
